# Supplementary material
Source: HighWire-hosted journal article supplement (https://ejhp.bmj.com/highwire/filestream/151532/field_highwire_adjunct_files/1/ejhpharm-2021-003071supp002_data_supplement.pdf)
Supplement: ejhpharm-2021-003071supp002_data_supplement.pdf [file ejhpharm-2021-003071supp002_data_supplement.pdf]

**Supplementary file 2:**

Categorization of identified discrepancies in before (n=200) and after (n=200) group. Data presented as number (percentage\*).

|                               | <b>Before (n=200)</b> | <b>After (n=200)</b> |
|-------------------------------|-----------------------|----------------------|
| Total number of discrepancies | 376 (100)             | 387 (100)            |
| Commission of drug            | 92 (24)               | 83 (21)              |
| Omission of drug              | 166 (44)              | 174 (44)             |
| Incorrect strength of drug    | 3 (1)                 | 4 (1)                |
| Incorrect dose                | 101 (27)              | 115 (30)             |
| Incorrect drug formulation    | 6 (2)                 | 5 (1)                |
| Incorrect administration time | 8 (2)                 | 6 (2)                |

\* percentages do not add up to exactly 100% due to rounding of numbers
